# Supplementary material
Source: PubMed Central journal article supplement (PMC9172578)
Supplement: jpga-74-e138-s001.pdf [file jpga-74-e138-s001.pdf]

**SUPPLEMENTARY ONLINE CONTENT**

*Evolution of International Pediatric Endoscopic Practice Changes During the COVID-19*

**Table 1.** Characteristics of institutions at follow up (n=75)

| <b>Characteristic</b>                                           | <b>N (%)</b> |
|-----------------------------------------------------------------|--------------|
| <b>Geographic Location</b>                                      |              |
| Europe                                                          | 17 (22.7%)   |
| Other Continents                                                |              |
| Asia                                                            | 9 (12.0%)    |
| Australia                                                       | 3 (4.0%)     |
| South America                                                   | 0 (0.0%)     |
| Zealandia                                                       | 1 (1.3%)     |
| Antarctica                                                      | 0 (0.0%)     |
| North America                                                   |              |
| Canada                                                          | 5 (6.7%)     |
| Mexico                                                          | 1 (1.3%)     |
| United States                                                   | 39 (52.0%)   |
| <b>Institution Type</b>                                         |              |
| Free standing children’s hospital                               | 42 (56.0%)   |
| Pediatric endoscopy within adult unit/hospital                  | 30 (40.0%)   |
| Other                                                           | 3 (4.0%)     |
| <b>Trend of confirmed COVID-19 cases compared to April 2020</b> |              |
| Increasing                                                      | 53 (70.7%)   |
| Decreasing                                                      | 14 (18.7%)   |
| Similar                                                         | 8 (10.7%)    |
| <b>Area under stay-at-home or quarantine order</b>              |              |
| Yes                                                             | 17 (22.7%)   |
| No                                                              | 58 (77.3%)   |
| <b>Undergoing Reopening</b>                                     |              |
| Yes                                                             | 41 (54.7%)   |
| No                                                              | 34 (45.3%)   |
| <b>Phase of Reopening (n=41)</b>                                |              |
| Phase 1*                                                        | 11 (26.8%)   |
| Phase 2**                                                       | 22 (53.7%)   |
| Phase 3***                                                      | 8 (19.5%)    |
| <b>In person school occurring</b>                               |              |
| At all schools                                                  | 21 (28.0%)   |
| At some schools                                                 | 45 (60.0%)   |
| No in person school is occurring                                | 9 (12.0%)    |
| <b>Changes in institutional practices based on</b>              |              |
| Societal guidelines                                             | 32 (42.7%)   |
| National health recommendations                                 | 48 (64.0%)   |
| Institutional guidelines                                        | 50 (66.7%)   |
| Change in community spread of COVID-19                          | 35 (46.7%)   |
| Geographic burden of COVID-19                                   | 27 (36.0%)   |
| No practices have been updated/changed                          | 10 (13.3%)   |

\*Phase 1: Vulnerable groups shelter in place, nonvulnerable avoid groups of 10 or more. Businesses limit non-essential travel, encourage teleworking, close common areas of workplace. Sit down restaurants, movie theaters, gyms, churches allowed to reopen but only if there’s social distancing.

\*\*Phase 2: Vulnerable groups shelter in place, nonvulnerable avoid groups of 50 or more. Businesses encourage teleworking, close common areas of workplace. Schools and bars will be able to reopen. Sit down restaurants, movie theaters, gyms, churches with moderate social distancing. Elective surgeries allowed to restart

\*\*\*Phase 3: Vulnerable groups can go out with caution. Businesses- most are back to normal. Restaurants, movie theaters, gyms, churches are open without worrying about social distancing.
